# Supplementary material for: Development of a ruthenium–aquo complex for utilization in synthesis and catalysis for selective hydration of nitriles and alkynes
Source: Royal Society of Chemistry journal article supplement (doi:10.1039/d1nj04736a), 2022-01-01
Supplement: d1nj04736a1.pdf [file d1nj04736a1.pdf]

## **Electronic supplementary information (ESI)**

### **Development of a ruthenium aquo complex for utilization in synthesis and, in catalysis for selective hydration of nitriles and alkynes†**

Rumpa Saha, Aparajita Mukherjee and Samaresh Bhattacharya\*

*Department of Chemistry, Inorganic Chemistry Section, Jadavpur University,*

*Kolkata - 700 032, India.*

*E-mail: samareshb.chemistry@jadavpuruniversity.in*

**Table S1.** Selected bond distances and bond angles for **1a**.

| Bond distances (Å) |            |           |          |
|--------------------|------------|-----------|----------|
| Ru1-N1             | 2.0636(17) | C3-N1     | 1.433(3) |
| Ru1-N2             | 1.9908(18) | C1-N1     | 1.305(3) |
| Ru1-N3             | 2.0741(19) | C1-C2     | 1.425(3) |
| Ru1-N4             | 1.9750(18) | C2-N2     | 1.295(3) |
| Ru1-N5             | 2.0777(19) | C10-N2    | 1.437(3) |
| Ru1-O3             | 2.1358(16) |           |          |
| Bond angles (°)    |            |           |          |
| N1-Ru1-N4          | 172.67(7)  | N1-Ru1-N2 | 77.67(7) |
| N2-Ru1-O3          | 175.98(7)  | N3-Ru1-N4 | 79.24(8) |
| N3-Ru1-N5          | 158.06(8)  | N4-Ru1-N5 | 79.11(8) |

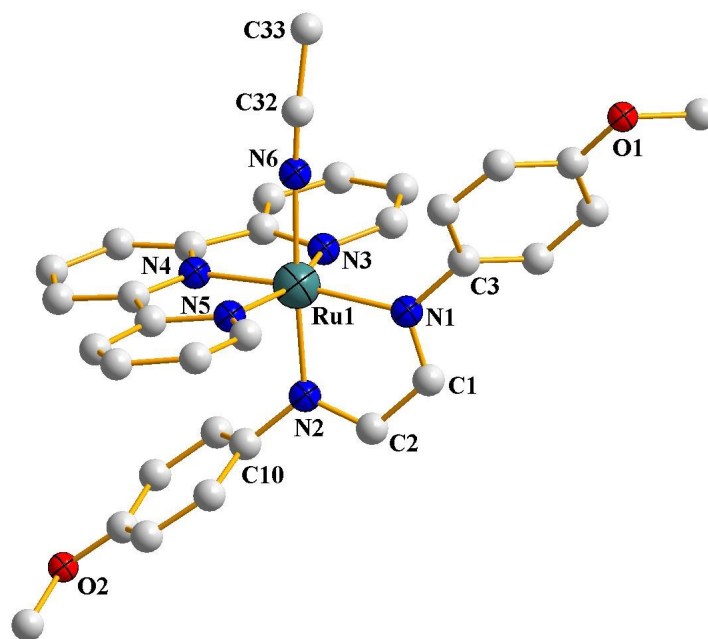

**Fig. S1** Crystal structure of complex **1b**. The perchlorate ions and hydrogen atoms are omitted for clarity.

**Table S2.** Selected bond distances and bond angles for **1b**.

| Bond distances (Å) |          |            |           |
|--------------------|----------|------------|-----------|
| Ru1-N1             | 2.065(8) | C3-N1      | 1.443(13) |
| Ru1-N2             | 2.005(8) | C1-N1      | 1.301(14) |
| Ru1-N3             | 2.083(9) | C1-C2      | 1.425(16) |
| Ru1-N4             | 1.979(8) | C2-N2      | 1.295(13) |
| Ru1-N5             | 1.984(7) | C10-N2     | 1.449(13) |
| Ru1-N6             | 2.039(9) |            |           |
| Bond angles (°)    |          |            |           |
| N1-Ru1-N4          | 170.6(3) | N3-Ru1-N4  | 79.8(4)   |
| N2-Ru1-N6          | 174.3(3) | N4-Ru1-N5  | 79.4(3)   |
| N3-Ru1-N5          | 159.1(3) | Ru1-N6-C32 | 175.9(10) |
| N1-Ru1-N2          | 77.2(4)  | N6-C32-C33 | 178.2(16) |

**Table S3.** Selected bond distances and bond angles for **1d**.

| Bond distances (Å) |          |           |           |
|--------------------|----------|-----------|-----------|
| Ru1-N1             | 2.066(8) | C3-N1     | 1.414(14) |
| Ru1-N2             | 2.050(8) | C1-N1     | 1.290(14) |
| Ru1-N3             | 2.075(8) | C1-C2     | 1.394(16) |
| Ru1-N4             | 1.987(8) | C2-N2     | 1.272(14) |
| Ru1-N5             | 2.061(8) | C10-N2    | 1.446(14) |
| Ru1-N6             | 2.099(9) |           |           |
| Bond angles (°)    |          |           |           |
| N1-Ru1-N4          | 175.0(3) | N1-Ru1-N2 | 76.8(4)   |
| N2-Ru1-N6          | 170.0(4) | N3-Ru1-N4 | 79.2(3)   |
| N3-Ru1-N5          | 157.6(3) | N4-Ru1-N5 | 78.5(3)   |

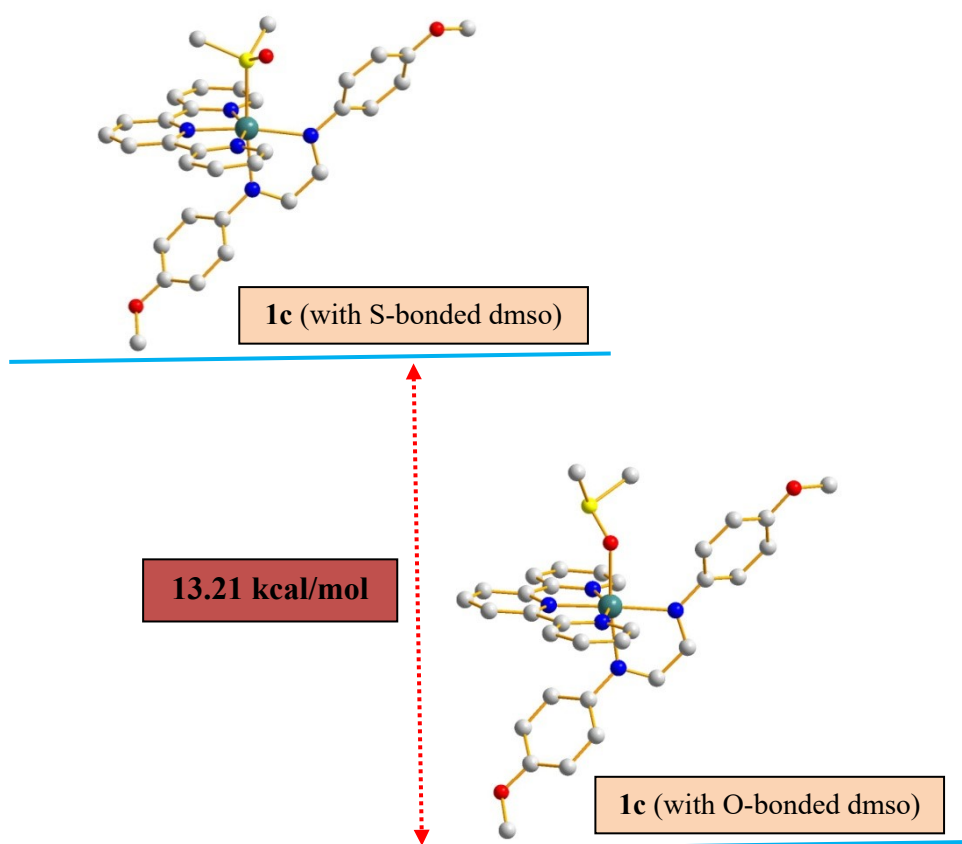

**Fig. S2.** Energy difference between linkage isomers of **1c**.

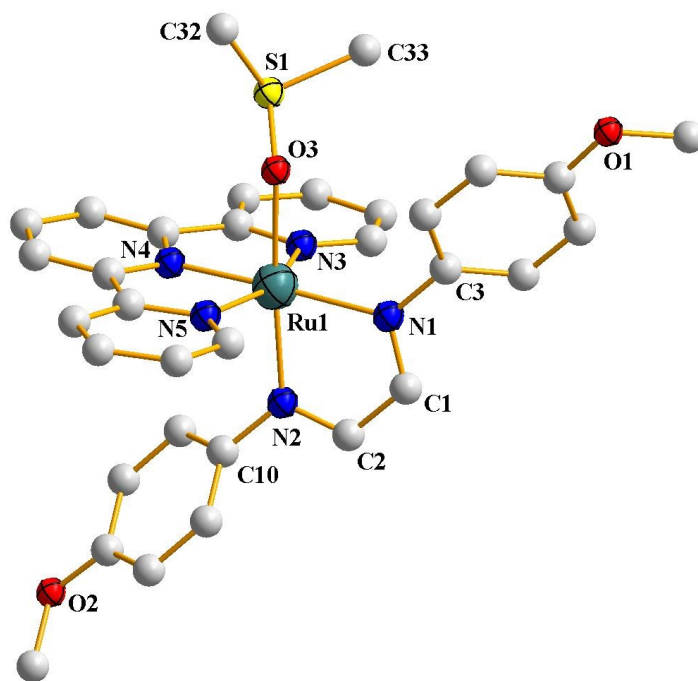

**Fig. S3.** DFT-optimized structure of **1c**. The hydrogen atoms are omitted for clarity.

**Table S4.** Some computed bond distances and bond angles for complex **1c**.

| Bond distances (Å) |         |           |         |
|--------------------|---------|-----------|---------|
| Ru1-N1             | 2.151   | C1-N1     | 1.313   |
| Ru1-N2             | 2.086   | C3-N1     | 1.417   |
| Ru1-N3             | 2.133   | C1-C2     | 1.427   |
| Ru1-N4             | 2.007   | C2-N2     | 1.313   |
| Ru1-N5             | 2.116   | C10-N2    | 1.422   |
| Ru1-O3             | 2.195   | S1-C32    | 1.816   |
| O3-S1              | 1.526   | S1-C33    | 1.822   |
| Bond angles (°)    |         |           |         |
| N1-Ru1-N2          | 77.799  | N3-Ru1-N4 | 78.427  |
| N2-Ru1-O3          | 170.139 | N4-Ru1-N5 | 79.034  |
| N1-Ru1-N4          | 176.902 | N3-Ru1-N5 | 157.445 |
| Ru1-O3-S1          | 126.135 |           |         |

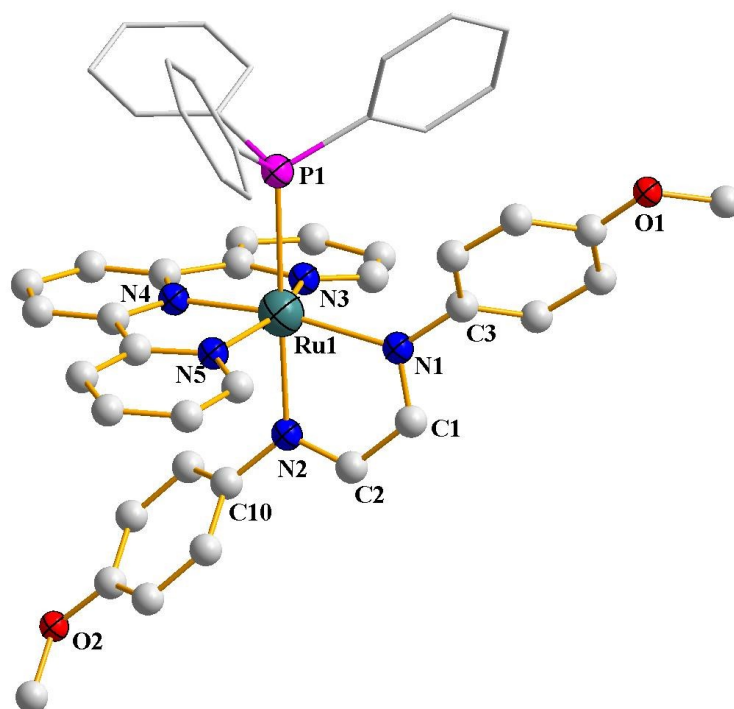

**Fig. S4.** DFT-optimized structure of **1e**. The hydrogen atoms are omitted for clarity.

**Table S5.** Some computed bond distances and bond angles for complex **1e**.

| Bond distances (Å) |         |           |         |
|--------------------|---------|-----------|---------|
| Ru1-N1             | 2.211   | C1-N1     | 1.312   |
| Ru1-N2             | 2.171   | C3-N1     | 1.422   |
| Ru1-N3             | 2.137   | C1-C2     | 1.431   |
| Ru1-N4             | 2.006   | C2-N2     | 1.304   |
| Ru1-N5             | 2.133   | C10-N2    | 1.423   |
| Ru1-P1             | 2.551   |           |         |
| Bond angles (°)    |         |           |         |
| N1-Ru1-N2          | 76.522  | N3-Ru1-N4 | 78.376  |
| N2-Ru1-P1          | 178.154 | N4-Ru1-N5 | 78.674  |
| N1-Ru1-N4          | 170.360 | N3-Ru1-N5 | 156.279 |

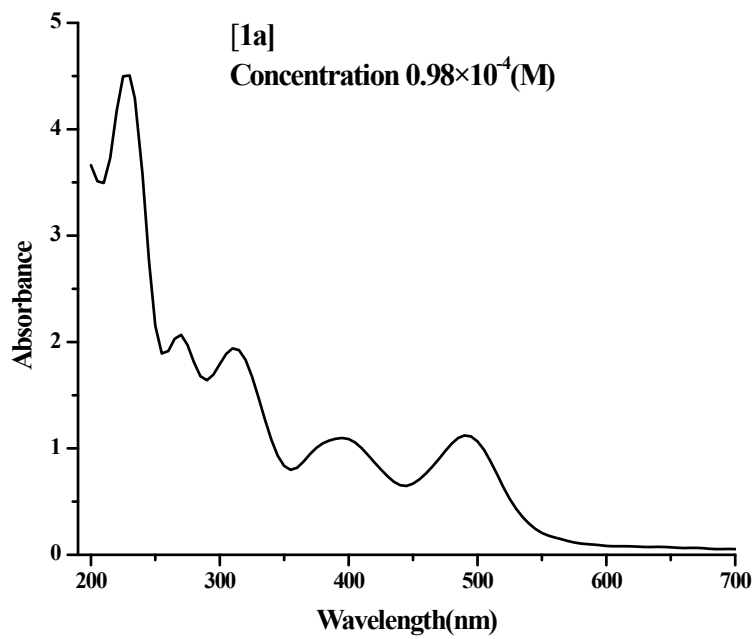

**Fig. S5.** Electronic absorption spectrum of complex **1a** in aqueous solution.



**Table S6.** Computed parameters from TDDFT calculations on complex **1a** for electronic spectral properties in aqueous solution.

| Excited State | Composition                                                                                                                                                                                                             | CI value                                                                                        | $E$ (eV) | Oscillator strength ( $f$ ) | $\lambda_{\text{theo}}$ (nm) | Assignment                                                                                                                  | $\lambda_{\text{exp}}$ (nm) |
|---------------|-------------------------------------------------------------------------------------------------------------------------------------------------------------------------------------------------------------------------|-------------------------------------------------------------------------------------------------|----------|-----------------------------|------------------------------|-----------------------------------------------------------------------------------------------------------------------------|-----------------------------|
| 1             | H-3 $\rightarrow$ L<br>H-1 $\rightarrow$ L<br>H $\rightarrow$ L                                                                                                                                                         | 0.44216<br>0.37240<br>0.39467                                                                   | 2.5721   | 0.4901                      | 482                          | MLCT/LLCT<br>ILCT<br>ILCT                                                                                                   | 492                         |
| 2             | H-4 $\rightarrow$ L<br>H-4 $\rightarrow$ L+1<br>H-3 $\rightarrow$ L+1<br>H-2 $\rightarrow$ L<br>H-2 $\rightarrow$ L+1<br>H-1 $\rightarrow$ L+1<br>H-1 $\rightarrow$ L+2<br>H-1 $\rightarrow$ L+5<br>H $\rightarrow$ L+5 | 0.43694<br>0.10291<br>0.24545<br>0.12469<br>0.11714<br>0.10428<br>0.10440<br>0.27243<br>0.20279 | 3.1122   | 0.0277                      | 389                          | MLCT/ILCT/LLCT<br>MLCT/ILCT<br>MLCT/ILCT<br>MLCT/LLCT<br>MLCT/LLCT/ILCT<br>LLCT<br>LLCT<br>LMCT/LLCT/ILCT<br>LMCT/LLCT/ILCT | 395                         |
| 3             | H-5 $\rightarrow$ L+1<br>H $\rightarrow$ L+3<br>H $\rightarrow$ L+4<br>H $\rightarrow$ L+5                                                                                                                              | 0.40042<br>0.34558<br>0.37591<br>0.10524                                                        | 3.9929   | 0.2109                      | 310                          | LLCT<br>LLCT<br>LLCT<br>LMCT/LLCT/ILCT                                                                                      | 312                         |
| 4             | H-8 $\rightarrow$ L+1<br>H-5 $\rightarrow$ L+2<br>H-3 $\rightarrow$ L+3<br>H-3 $\rightarrow$ L+4<br>H-2 $\rightarrow$ L+4<br>H-1 $\rightarrow$ L+4                                                                      | 0.13454<br>0.48720<br>0.26888<br>0.27855<br>0.10789<br>0.21551                                  | 4.5044   | 0.0880                      | 275                          | ILCT<br>LLCT<br>MLCT/ILCT<br>MLCT/ILCT<br>MLCT/ILCT/LLCT<br>LLCT                                                            | 269                         |
| 5             | H-12 $\rightarrow$ L<br>H-11 $\rightarrow$ L<br>H-10 $\rightarrow$ L+1<br>H-5 $\rightarrow$ L+4<br>H-1 $\rightarrow$ L+9                                                                                                | 0.35228<br>0.23171<br>0.13218<br>0.27703<br>0.36093                                             | 5.1824   | 0.0136                      | 239                          | ILCT/LMCT<br>ILCT/LMCT<br>LLCT<br>LLCT<br>ILCT/LLCT                                                                         | 227                         |

**Table S7.** Compositions of the molecular orbitals of complex **1a** associated with the electronic spectral transitions.

| % Contribution of fragments to | Fragments |      |                    |                  |
|--------------------------------|-----------|------|--------------------|------------------|
|                                | Ru        | trpy | L-OCH <sub>3</sub> | H <sub>2</sub> O |
| HOMO (H)                       | 5         | 1    | 94                 | 0                |
| H-1                            | 9         | 2    | 89                 | 0                |
| H-2                            | 73        | 14   | 12                 | 1                |
| H-3                            | 77        | 17   | 5                  | 1                |
| H-4                            | 66        | 11   | 23                 | 0                |
| H-5                            | 0         | 0    | 99                 | 1                |
| H-8                            | 2         | 95   | 3                  | 0                |
| H-10                           | 0         | 1    | 99                 | 0                |
| H-11                           | 1         | 3    | 95                 | 1                |
| H-12                           | 0         | 1    | 98                 | 1                |
| LUMO (L)                       | 10        | 2    | 88                 | 0                |
| L+1                            | 6         | 93   | 0                  | 1                |
| L+2                            | 1         | 99   | 0                  | 0                |
| L+3                            | 3         | 96   | 0                  | 1                |
| L+4                            | 3         | 97   | 0                  | 0                |
| L+5                            | 52        | 12   | 18                 | 18               |
| L+9                            | 11        | 3    | 72                 | 14               |

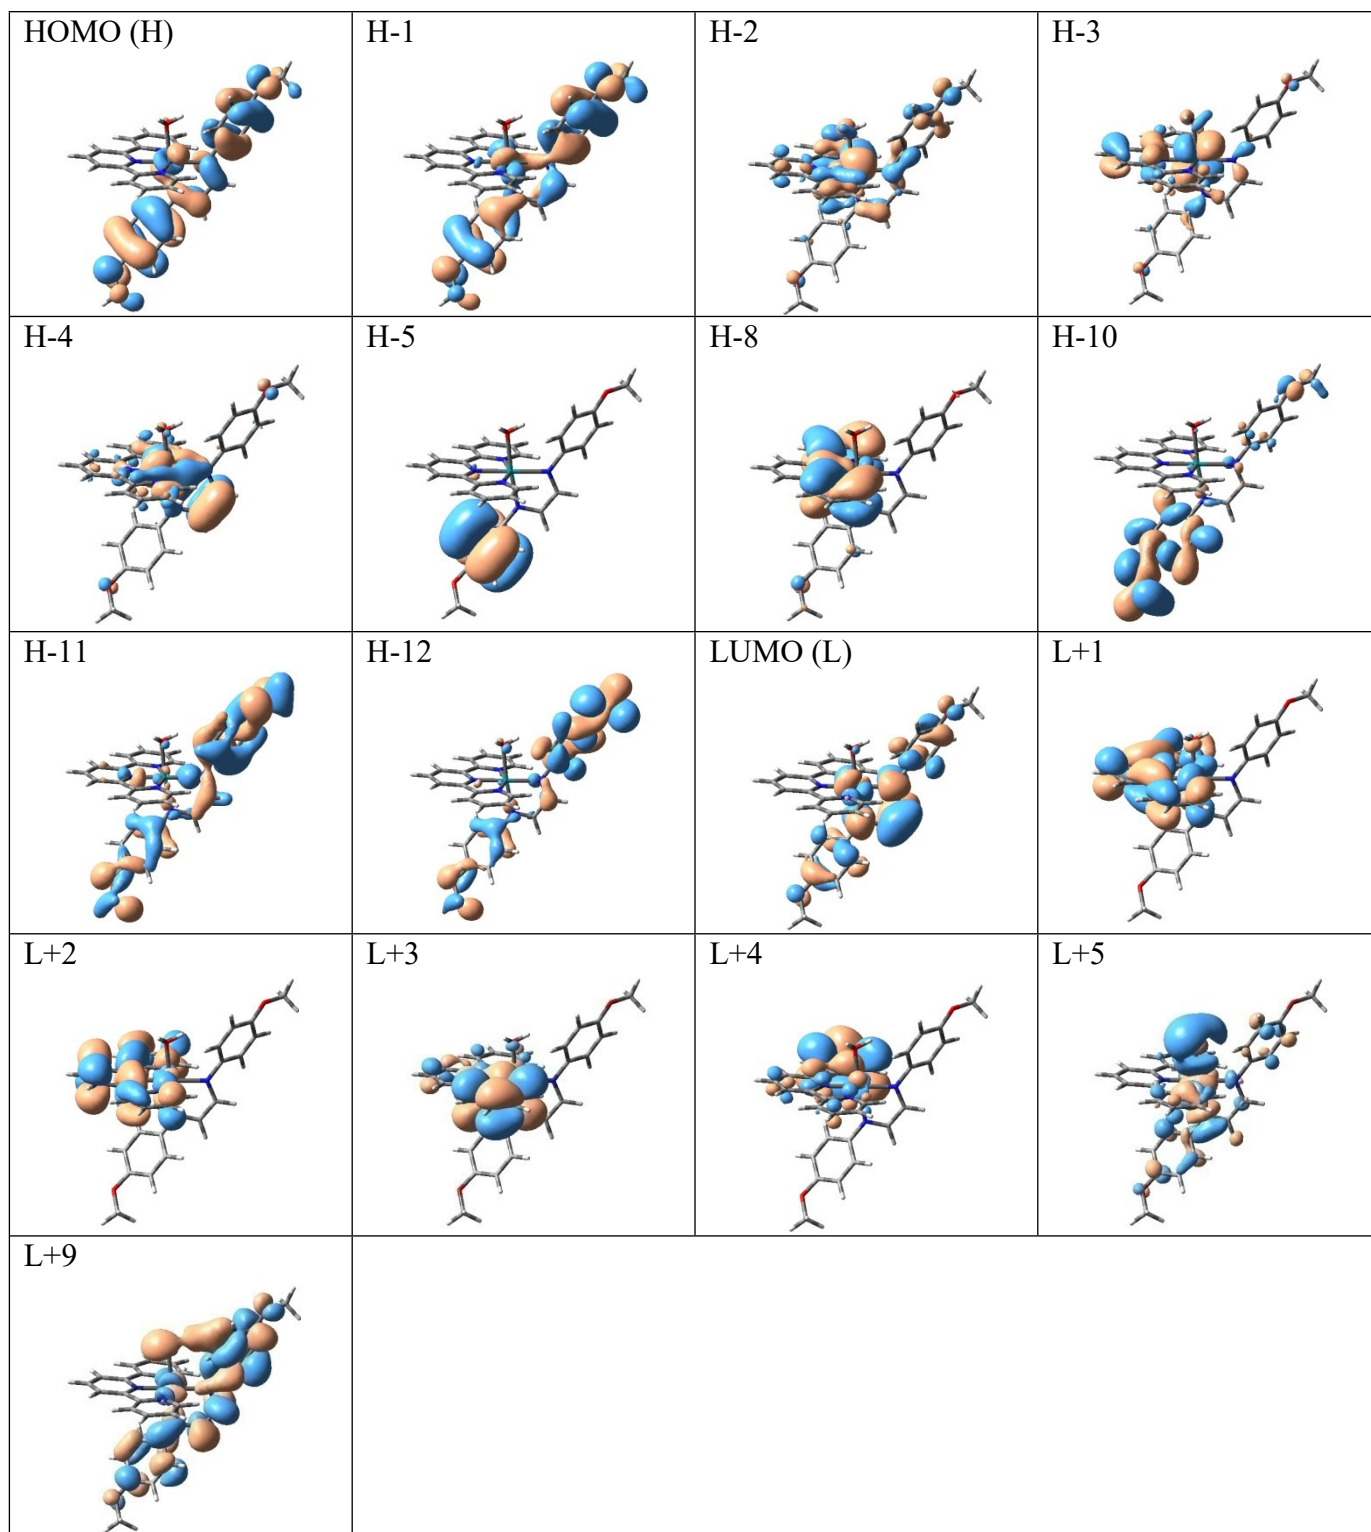

**Fig. S6.** Contour plots of the molecular orbitals of complex **1a**, which are associated with the electronic spectral transitions (See **Table S6**).

**Table S8.** Computed parameters from TDDFT calculations on complex **1b** for electronic spectral properties in acetonitrile solution.

| Excited state | Composition                                                                                                                                                                                        | CI value                                                                             | $E$ (eV) | Oscillator strength ( $f$ ) | $\lambda_{\text{theo}}$ (nm) | Assignment                                                                                                          | $\lambda_{\text{exp}}$ (nm) |
|---------------|----------------------------------------------------------------------------------------------------------------------------------------------------------------------------------------------------|--------------------------------------------------------------------------------------|----------|-----------------------------|------------------------------|---------------------------------------------------------------------------------------------------------------------|-----------------------------|
| 1             | H-3 $\rightarrow$ L<br>H-1 $\rightarrow$ L<br>H $\rightarrow$ L                                                                                                                                    | 0.49112<br>0.28458<br>0.40475                                                        | 2.5632   | 0.4854                      | 484                          | MLCT/LLCT<br>ILCT<br>ILCT                                                                                           | 481                         |
| 2             | H-4 $\rightarrow$ L<br>H-3 $\rightarrow$ L+1<br>H-2 $\rightarrow$ L                                                                                                                                | 0.63154<br>0.10707<br>0.24464                                                        | 3.0572   | 0.0456                      | 405                          | MLCT/ILCT/LLCT<br>MLCT/ILCT<br>MLCT/LLCT                                                                            | 405                         |
| 3             | H-5 $\rightarrow$ L+1<br>H $\rightarrow$ L+3                                                                                                                                                       | 0.44630<br>0.50881                                                                   | 4.0032   | 0.2295                      | 310                          | LLCT<br>LLCT                                                                                                        | 304                         |
| 4             | H-8 $\rightarrow$ L+1<br>H-5 $\rightarrow$ L+2<br>H-3 $\rightarrow$ L+3<br>H-3 $\rightarrow$ L+4<br>H-2 $\rightarrow$ L+4<br>H-1 $\rightarrow$ L+4                                                 | 0.12636<br>0.48345<br>0.34287<br>0.18001<br>0.14342<br>0.21724                       | 4.5065   | 0.0979                      | 275                          | ILCT<br>LLCT<br>MLCT/LLCT/ILCT<br>MLCT/ILCT/LLCT<br>MLCT/ILCT/LLCT<br>LLCT                                          | 273                         |
| 5             | H-12 $\rightarrow$ L<br>H-2 $\rightarrow$ L+7<br>H-2 $\rightarrow$ L+8<br>H-2 $\rightarrow$ L+9<br>H-1 $\rightarrow$ L+7<br>H-1 $\rightarrow$ L+8<br>H-1 $\rightarrow$ L+9<br>H $\rightarrow$ L+10 | 0.15867<br>0.33532<br>0.19579<br>0.16477<br>0.19995<br>0.30896<br>0.21252<br>0.19191 | 5.1735   | 0.0187                      | 240                          | ILCT/LMCT<br>IMCT/MLCT/LLCT/ILCT<br>MLCT/LLCT<br>MLCT/LLCT<br>LMCT/LLCT/ILCT<br>ILCT/LLCT<br>ILCT/LLCT<br>LLCT/ILCT | 232                         |

**Table S9.** Compositions of the molecular orbitals of complex **1b** associated with the electronic spectral transitions.

| % Contribution of fragments to | Fragments |      |                    |                    |
|--------------------------------|-----------|------|--------------------|--------------------|
|                                | Ru        | trpy | L-OCH <sub>3</sub> | CH <sub>3</sub> CN |
| HOMO (H)                       | 4         | 0    | 96                 | 0                  |
| H-1                            | 6         | 1    | 93                 | 0                  |
| H-2                            | 73        | 14   | 9                  | 4                  |
| H-3                            | 74        | 16   | 5                  | 5                  |
| H-4                            | 69        | 12   | 18                 | 1                  |
| H-5                            | 0         | 1    | 99                 | 0                  |
| H-8                            | 2         | 94   | 4                  |                    |
| H-12                           | 0         | 1    | 99                 | 0                  |
| LUMO (L)                       | 8         | 3    | 89                 | 2                  |
| L+1                            | 5         | 94   | 1                  | 0                  |
| L+2                            | 1         | 98   | 0                  | 1                  |
| L+3                            | 1         | 99   | 0                  | 0                  |
| L+4                            | 3         | 97   | 0                  | 0                  |
| L+7                            | 55        | 15   | 26                 | 4                  |
| L+8                            | 4         | 2    | 80                 | 14                 |
| L+9                            | 4         | 2    | 77                 | 17                 |
| L+10                           | 6         | 1    | 15                 | 78                 |

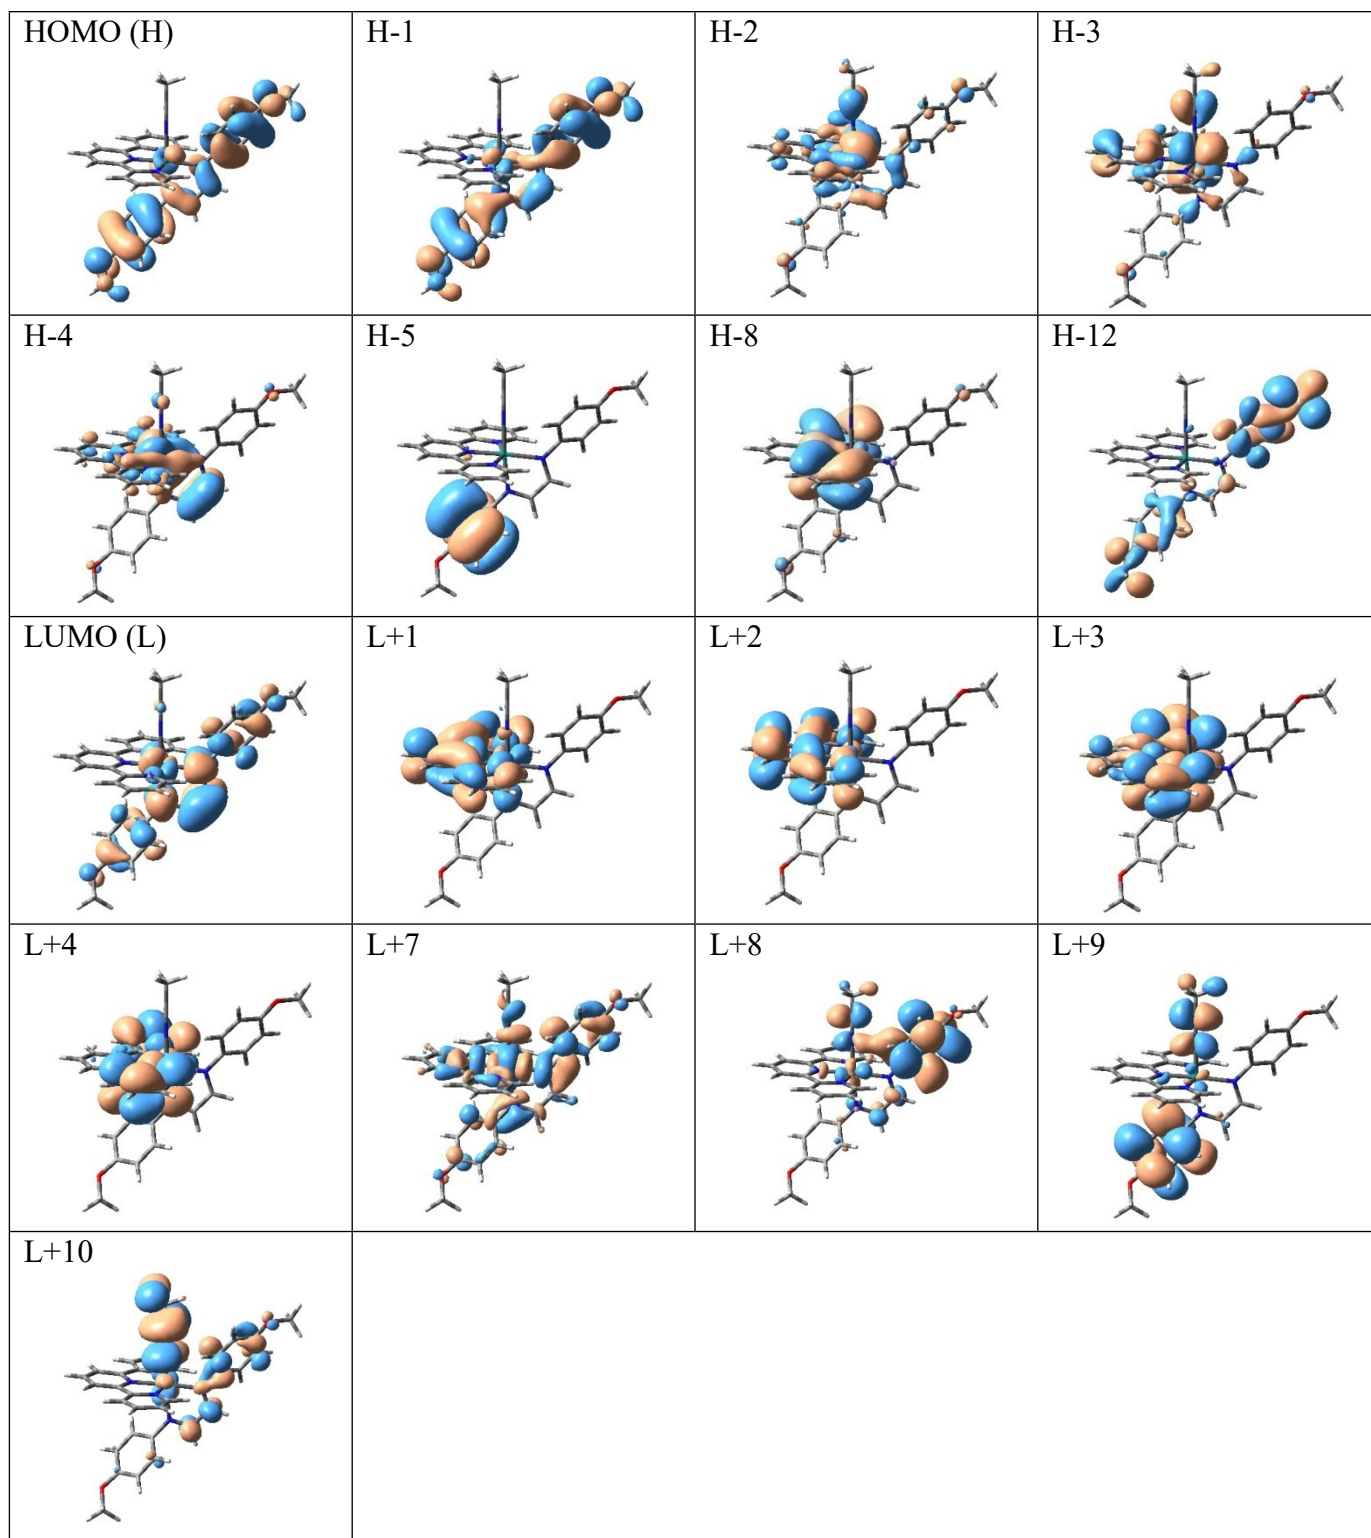

**Fig. S7.** Contour plots of the molecular orbitals of complex **1b**, which are associated with the electronic spectral transitions (See **Table S8**).

**Table S10.** Computed parameters from TDDFT calculations on complex **1c** for electronic spectral properties in acetonitrile solution.

| Excited State | Composition                                                                                                                                                                                                                                      | CI value                                                                                                   | $E$ (eV) | Oscillator strength ( $f$ ) | $\lambda_{\text{theo}}$ (nm) | Assignment                                                                                                                              | $\lambda_{\text{exp}}$ (nm) |
|---------------|--------------------------------------------------------------------------------------------------------------------------------------------------------------------------------------------------------------------------------------------------|------------------------------------------------------------------------------------------------------------|----------|-----------------------------|------------------------------|-----------------------------------------------------------------------------------------------------------------------------------------|-----------------------------|
| 1             | H-2 $\rightarrow$ L<br>H-1 $\rightarrow$ L<br>H $\rightarrow$ L                                                                                                                                                                                  | 0.54729<br>0.15447<br>0.39826                                                                              | 2.5655   | 0.5531                      | 483.28                       | MLCT/LLCT<br>ILCT/MLCT<br>ILCT                                                                                                          | 486                         |
| 2             | H-4 $\rightarrow$ L<br>H-3 $\rightarrow$ L<br>H-3 $\rightarrow$ L+1<br>H-3 $\rightarrow$ L+2<br>H-2 $\rightarrow$ L+1<br>H-1 $\rightarrow$ L+2                                                                                                   | 0.46758<br>0.21236<br>0.10453<br>0.11788<br>0.32982<br>0.25499                                             | 3.0525   | 0.0242                      | 406.18                       | MLCT/ILCT<br>MLCT/LLCT<br>MLCT/ILCT<br>MLCT/ILCT<br>MLCT/LLCT/ILCT<br>LLCT/MLCT                                                         | 403                         |
| 3             | H-5 $\rightarrow$ L+1<br>H-2 $\rightarrow$ L+3<br>H-2 $\rightarrow$ L+9<br>H-1 $\rightarrow$ L+3<br>H-1 $\rightarrow$ L+4<br>H-1 $\rightarrow$ L+5<br>H-1 $\rightarrow$ L+9<br>H $\rightarrow$ L+3<br>H $\rightarrow$ L+4<br>H $\rightarrow$ L+9 | 0.31171<br>0.10529<br>0.16964<br>0.35149<br>0.20294<br>0.17985<br>0.16712<br>0.11691<br>0.14905<br>0.12275 | 4.0151   | 0.1169                      | 308.80                       | LLCT<br>MLCT/ILCT/LLCT<br>MLCT/LLCT/ILCT<br>LLCT/MLCT<br>LLCT/MLCT<br>MLCT/ILCT/LLCT/LMCT<br>MLCT/ILCT<br>LLCT<br>LLCT<br>ILCT          | 309                         |
| 4             | H-6 $\rightarrow$ L+2<br>H-5 $\rightarrow$ L+2<br>H-2 $\rightarrow$ L+5<br>H-1 $\rightarrow$ L+5<br>H $\rightarrow$ L+5                                                                                                                          | 0.10232<br>0.35304<br>0.40564<br>0.11118<br>0.37918                                                        | 4.4551   | 0.1444                      | 278.30                       | LLCT<br>LLCT<br>MLCT/ILCT/LLCT/LMCT<br>MLCT/ILCT/LLCT/LMCT<br>LMCT/LLCT/ILCT                                                            | 271                         |
| 5             | H-15 $\rightarrow$ L<br>H-13 $\rightarrow$ L<br>H-4 $\rightarrow$ L+7<br>H-3 $\rightarrow$ L+7<br>H-3 $\rightarrow$ L+9<br>H-2 $\rightarrow$ L+7<br>H-2 $\rightarrow$ L+8<br>H-2 $\rightarrow$ L+9                                               | 0.31982<br>0.15501<br>0.28094<br>0.41276<br>0.10248<br>0.15762<br>0.13455<br>0.11581                       | 5.2754   | 0.0546                      | 235.02                       | LLCT<br>ILCT/LLCT<br>MLCT/ILCT/LLCT/LMCT<br>MLCT/ILCT/LLCT/LMCT<br>MLCT/LLCT<br>MLCT/ILCT/LLCT/LMCT<br>MLCT/ILCT/LLCT<br>MLCT/ILCT/LLCT | 216                         |

**Table S11.** Compositions of the molecular orbitals of complex **1c** associated with the electronic spectral transitions

| % Contribution<br>of fragments to | Fragments |      |                    |      |
|-----------------------------------|-----------|------|--------------------|------|
|                                   | Ru        | trpy | L-OCH <sub>3</sub> | DMSO |
| HOMO (H)                          | 6         | 1    | 93                 | 0    |
| H-1                               | 14        | 2    | 83                 | 1    |
| H-2                               | 70        | 12   | 14                 | 4    |
| H-3                               | 70        | 13   | 9                  | 7    |
| H-4                               | 68        | 10   | 22                 | 0    |
| H-5                               | 0         | 1    | 99                 | 0    |
| H-6                               | 1         | 0    | 97                 | 2    |
| H-13                              | 1         | 11   | 66                 | 22   |
| H-15                              | 1         | 90   | 5                  | 4    |
| LUMO (L)                          | 10        | 3    | 87                 | 0    |
| L+1                               | 7         | 91   | 1                  | 1    |
| L+2                               | 2         | 97   | 1                  | 0    |
| L+3                               | 2         | 96   | 0                  | 2    |
| L+4                               | 2         | 97   | 1                  | 0    |
| L+5                               | 57        | 11   | 17                 | 15   |
| L+7                               | 56        | 24   | 14                 | 6    |
| L+8                               | 4         | 2    | 85                 | 9    |
| L+9                               | 0         | 2    | 97                 | 1    |



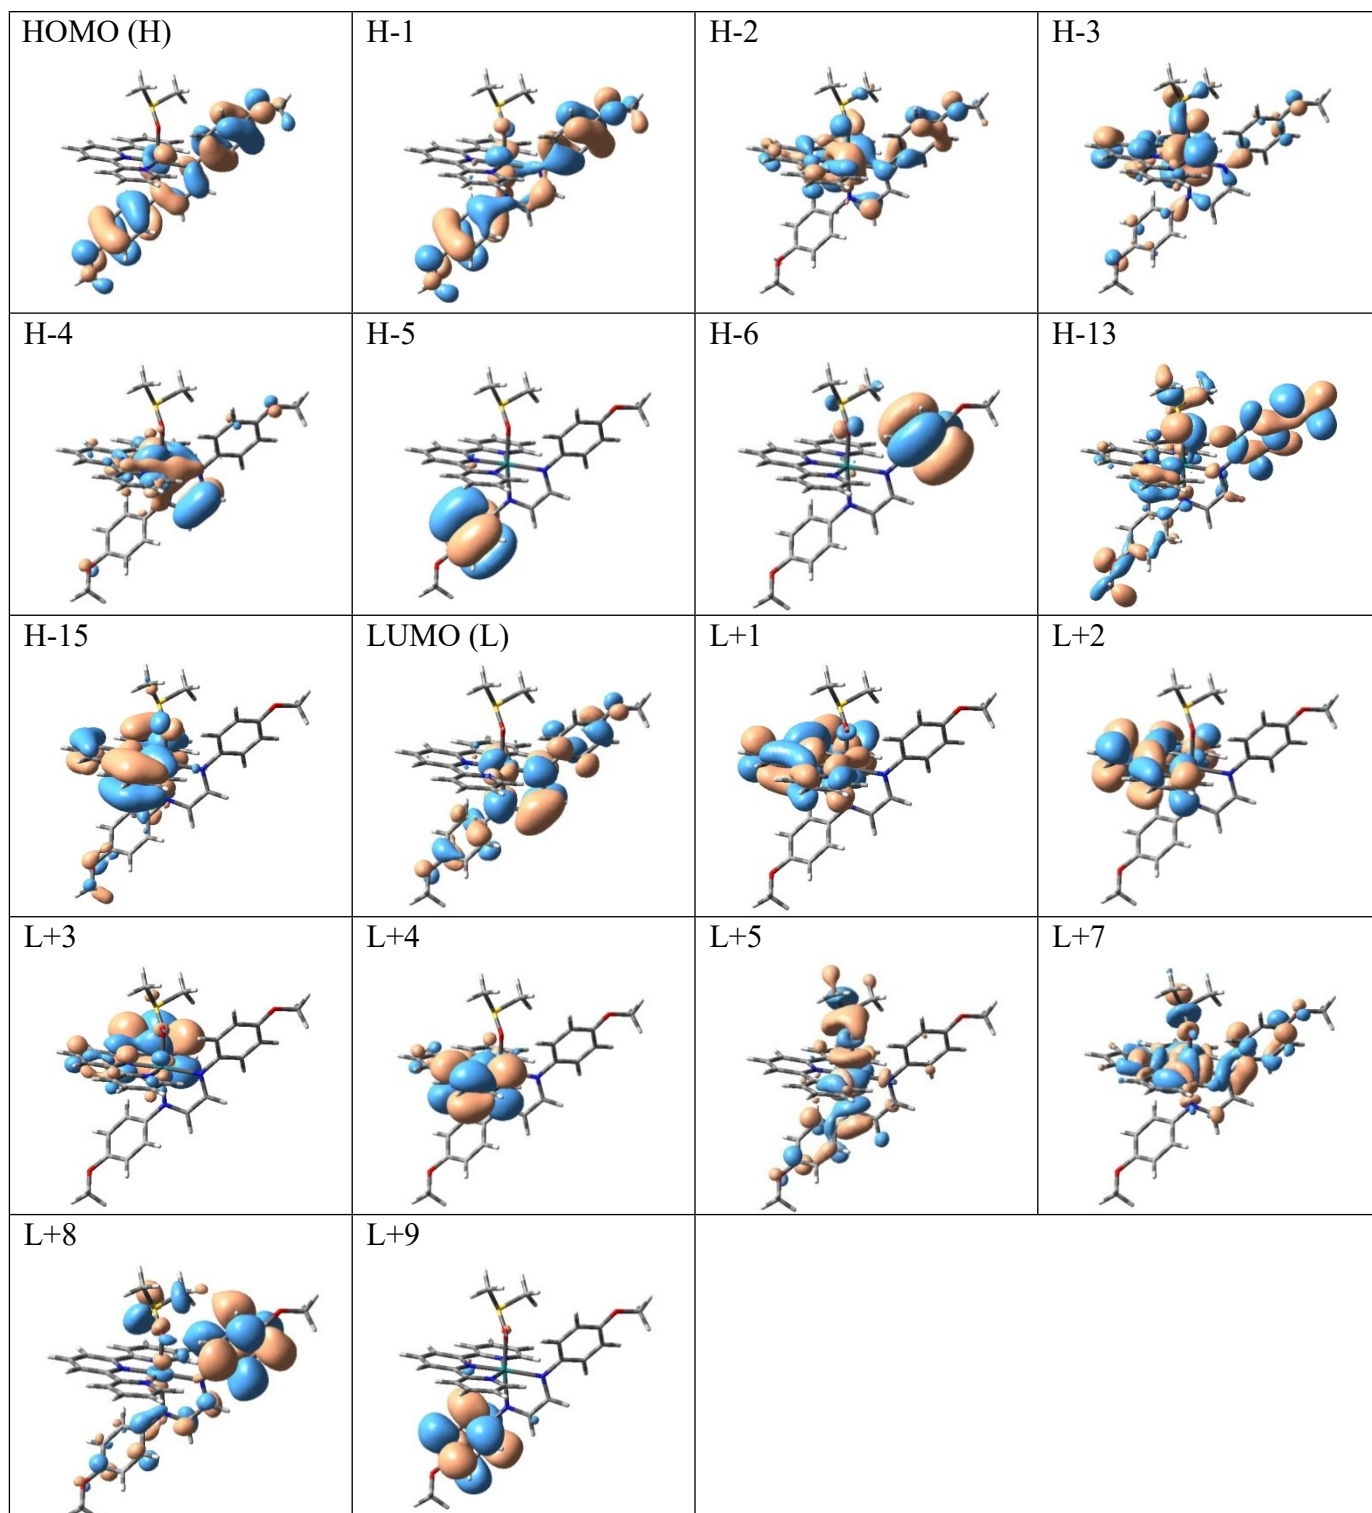

**Fig. S8.** Contour plots of the molecular orbitals of complex **1c**, which are associated with the electronic spectral transitions (See **Table S10**).

**Table S12.** Computed parameters from TDDFT calculations on complex **1d** for electronic spectral properties in acetonitrile solution.

| Excited State | Composition                                                                                                                                       | CI value                                                       | $E$ (eV) | Oscillator strength ( $f$ ) | $\lambda_{\text{theo}}$ (nm) | Assignment                                                            | $\lambda_{\text{exp}}$ (nm) |
|---------------|---------------------------------------------------------------------------------------------------------------------------------------------------|----------------------------------------------------------------|----------|-----------------------------|------------------------------|-----------------------------------------------------------------------|-----------------------------|
| 1             | H-3 $\rightarrow$ L<br>H-1 $\rightarrow$ L<br>H $\rightarrow$ L                                                                                   | 0.34955<br>0.42985<br>0.41819                                  | 2.5341   | 0.5379                      | 489                          | MLCT/LLCT<br>ILCT<br>ILCT                                             | 493                         |
| 2             | H-4 $\rightarrow$ L<br>H-4 $\rightarrow$ L+1<br>H-3 $\rightarrow$ L+1<br>H-2 $\rightarrow$ L<br>H-1 $\rightarrow$ L+1<br>H-1 $\rightarrow$ L+2    | 0.49666<br>0.10156<br>0.34931<br>0.23312<br>0.12310<br>0.11789 | 3.0361   | 0.0214                      | 408                          | MLCT/LLCT/ILCT<br>MLCT/LLCT<br>MLCT/ILCT<br>MLCT/LLCT<br>LLCT<br>LLCT | 410                         |
| 3             | H-5 $\rightarrow$ L+1<br>H $\rightarrow$ L+3<br>H $\rightarrow$ L+5                                                                               | 0.54863<br>0.31981<br>0.17420                                  | 3.9620   | 0.2109                      | 313                          | LLCT<br>LLCT<br>LLCT                                                  | 310                         |
| 4             | H-10 $\rightarrow$ L<br>H-8 $\rightarrow$ L+1<br>H-5 $\rightarrow$ L+2<br>H-3 $\rightarrow$ L+3<br>H-2 $\rightarrow$ L+4<br>H-1 $\rightarrow$ L+4 | 0.10579<br>0.27445<br>0.52526<br>0.10395<br>0.17197<br>0.14673 | 4.4638   | 0.0947                      | 278                          | ILCT/LLCT/LMCT<br>LLCT<br>LLCT<br>MLCT/ILCT<br>MLCT/LLCT/ILCT<br>LLCT | 272                         |
| 5             | H-13 $\rightarrow$ L<br>H-3 $\rightarrow$ L+8<br>H-1 $\rightarrow$ L+11<br>H-1 $\rightarrow$ L+12<br>H $\rightarrow$ L+12                         | 0.13239<br>0.13449<br>0.15755<br>0.21121<br>0.54779            | 5.1140   | 0.0335                      | 242                          | ILCT/LMCT<br>MLCT/LLCT<br>ILCT<br>ILCT<br>ILCT                        | 235                         |

**Table S13.** Compositions of the molecular orbitals of complex **1d** associated with the electronic spectral transitions

| % Contribution of fragments to | Fragments |      |                    |            |
|--------------------------------|-----------|------|--------------------|------------|
|                                | Ru        | trpy | L-OCH <sub>3</sub> | 4-picoline |
| HOMO (H)                       | 5         | 1    | 94                 | 0          |
| H-1                            | 7         | 1    | 92                 | 0          |
| H-2                            | 73        | 14   | 10                 | 3          |
| H-3                            | 76        | 16   | 4                  | 4          |
| H-4                            | 70        | 10   | 19                 | 1          |
| H-5                            | 0         | 1    | 99                 | 0          |
| H-8                            | 0         | 1    | 7                  | 92         |
| H-10                           | 0         | 26   | 72                 | 2          |
| H-13                           | 0         | 1    | 99                 | 0          |
| LUMO (L)                       | 10        | 1    | 89                 | 0          |
| L+1                            | 6         | 92   | 1                  | 1          |
| L+2                            | 1         | 98   | 0                  | 1          |
| L+3                            | 1         | 98   | 0                  | 1          |
| L+4                            | 3         | 96   | 0                  | 1          |
| L+5                            | 4         | 0    | 1                  | 95         |
| L+8                            | 1         | 42   | 5                  | 52         |
| L+11                           | 2         | 1    | 97                 | 0          |
| L+12                           | 5         | 3    | 92                 | 0          |

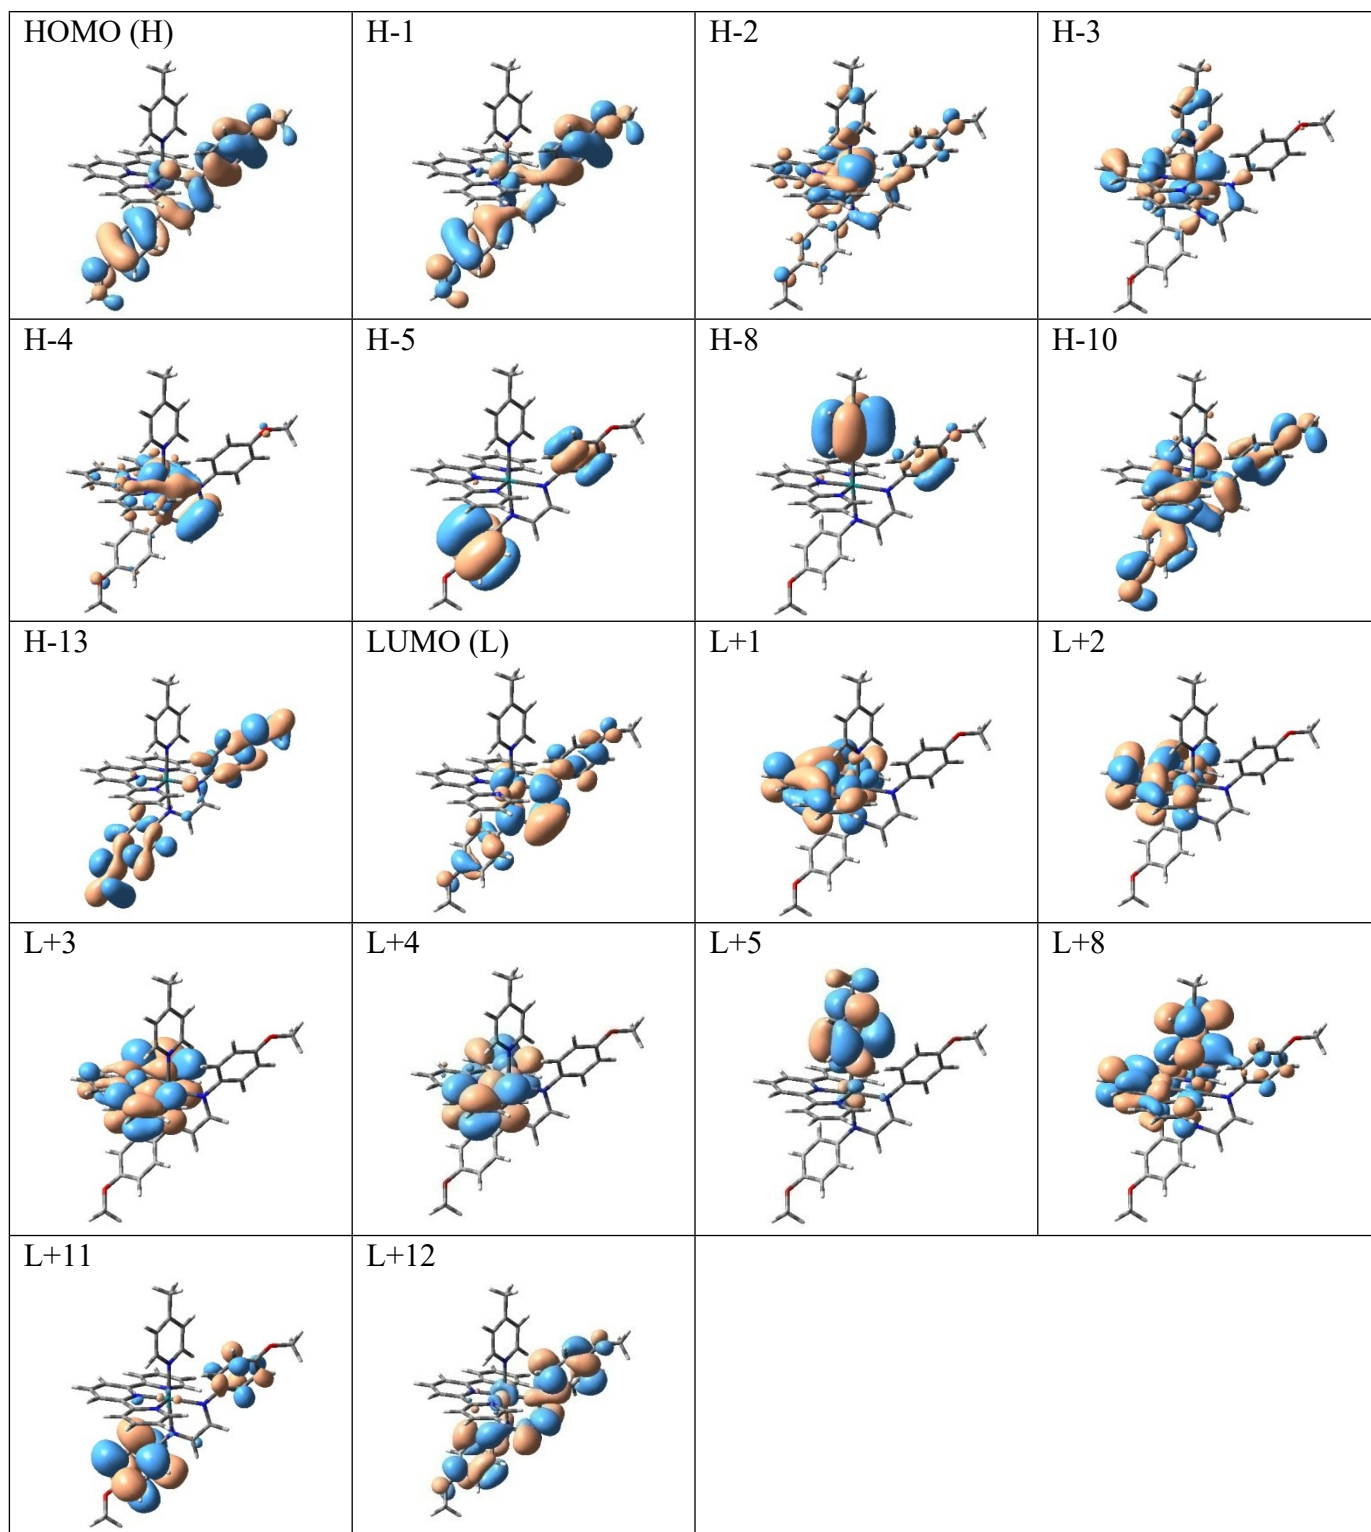

**Fig. S9.** Contour plots of the molecular orbitals of complex **1d**, which are associated with the electronic spectral transitions (See **Table S12**).

**Table S14.** Computed parameters from TDDFT calculations on complex **1e** for electronic spectral properties in acetonitrile solution.

| Excited State | Composition                                                                                                                                                                   | CI value                                                                  | $E$ (eV) | Oscillator strength ( $f$ ) | $\lambda_{\text{theo}}$ (nm) | Assignment                                                                                        | $\lambda_{\text{exp}}$ (nm) |
|---------------|-------------------------------------------------------------------------------------------------------------------------------------------------------------------------------|---------------------------------------------------------------------------|----------|-----------------------------|------------------------------|---------------------------------------------------------------------------------------------------|-----------------------------|
| 1             | H-3 $\rightarrow$ L<br>H-2 $\rightarrow$ L<br>H-1 $\rightarrow$ L<br>H $\rightarrow$ L                                                                                        | 0.44901<br>0.21785<br>0.24486<br>0.41560                                  | 2.4677   | 0.3669                      | 502.43                       | MLCT/LLCT<br>MLCT/LLCT<br>ILCT<br>ILCT                                                            | 485                         |
| 2             | H-5 $\rightarrow$ L<br>H-3 $\rightarrow$ L+1<br>H-3 $\rightarrow$ L+2<br>H-2 $\rightarrow$ L+1<br>H-2 $\rightarrow$ L+2<br>H-1 $\rightarrow$ L+2<br>H $\rightarrow$ L+2       | 0.46758<br>0.21236<br>0.10453<br>0.11788<br>0.32982<br>0.25499            | 3.1130   | 0.0205                      | 398.28                       | LLCT<br>MLCT/LLCT<br>MLCT/LLCT<br>MLCT/ILCT<br>MLCT/ILCT<br>LLCT<br>LLCT                          | 406                         |
| 3             | H-3 $\rightarrow$ L+5<br>H-3 $\rightarrow$ L+9<br>H-1 $\rightarrow$ L+4<br>H-1 $\rightarrow$ L+5<br>H $\rightarrow$ L+3<br>H $\rightarrow$ L+4<br>H $\rightarrow$ L+5         | 0.31171<br>0.10529<br>0.16964<br>0.35149<br>0.20294<br>0.17985<br>0.16712 | 4.0540   | 0.1060                      | 305.83                       | MLCT/LLCT/ILCT/LMCT<br>MLCT/LLCT/ILCT<br>LLCT<br>LLCT/ILCT/LMCT<br>LLCT<br>LLCT<br>LLCT/ILCT/LMCT | 307                         |
| 4             | H-11 $\rightarrow$ L+2<br>H-10 $\rightarrow$ L+2<br>H-4 $\rightarrow$ L+3<br>H-4 $\rightarrow$ L+5<br>H-2 $\rightarrow$ L+3<br>H-2 $\rightarrow$ L+5<br>H-1 $\rightarrow$ L+3 | 0.10963<br>0.24403<br>0.39297<br>0.18952<br>0.31114<br>0.25729<br>0.15528 | 4.4670   | 0.0534                      | 277.56                       | LLCT<br>LLCT<br>MLCT/LLCT/ILCT<br>MLCT/LLCT/ILCT/LMCT<br>MLCT/ILCT<br>MLCT/LLCT/LMCT<br>LLCT      | 271                         |
| 5             | H-7 $\rightarrow$ L+4<br>H-7 $\rightarrow$ L+5<br>H-4 $\rightarrow$ L+6<br>H-2 $\rightarrow$ L+6<br>H-2 $\rightarrow$ L+8                                                     | 0.10637<br>0.13913<br>0.53488<br>0.23400<br>0.11942                       | 4.9812   | 0.0337                      | 248.90                       | MLCT/LLCT<br>MLCT/LLCT/ILCT/LMCT<br>MLCT/LLCT/ILCT<br>MLCT/ILCT<br>MLCT/LLCT/ILCT/LMCT            | 227                         |

**Table S15.** Compositions of the molecular orbitals of complex **1e** associated with the electronic spectral transitions

| % Contribution<br>of fragments to | Fragments |      |                    |                  |
|-----------------------------------|-----------|------|--------------------|------------------|
|                                   | Ru        | trpy | L-OCH <sub>3</sub> | PPh <sub>3</sub> |
| HOMO (H)                          | 4         | 1    | 93                 | 2                |
| H-1                               | 6         | 1    | 90                 | 3                |
| H-2                               | 74        | 15   | 8                  | 3                |
| H-3                               | 27        | 4    | 5                  | 64               |
| H-4                               | 51        | 13   | 7                  | 29               |
| H-5                               | 1         | 1    | 4                  | 94               |
| H-7                               | 16        | 3    | 8                  | 73               |
| H-10                              | 1         | 1    | 9                  | 89               |
| H-11                              | 1         | 0    | 73                 | 26               |
| LUMO (L)                          | 8         | 2    | 90                 | 0                |
| L+1                               | 6         | 92   | 1                  | 1                |
| L+2                               | 1         | 98   | 0                  | 1                |
| L+3                               | 1         | 97   | 0                  | 2                |
| L+4                               | 3         | 95   | 0                  | 2                |
| L+5                               | 48        | 8    | 14                 | 30               |
| L+6                               | 4         | 91   | 1                  | 4                |
| L+8                               | 22        | 10   | 4                  | 64               |
| L+9                               | 3         | 2    | 18                 | 77               |

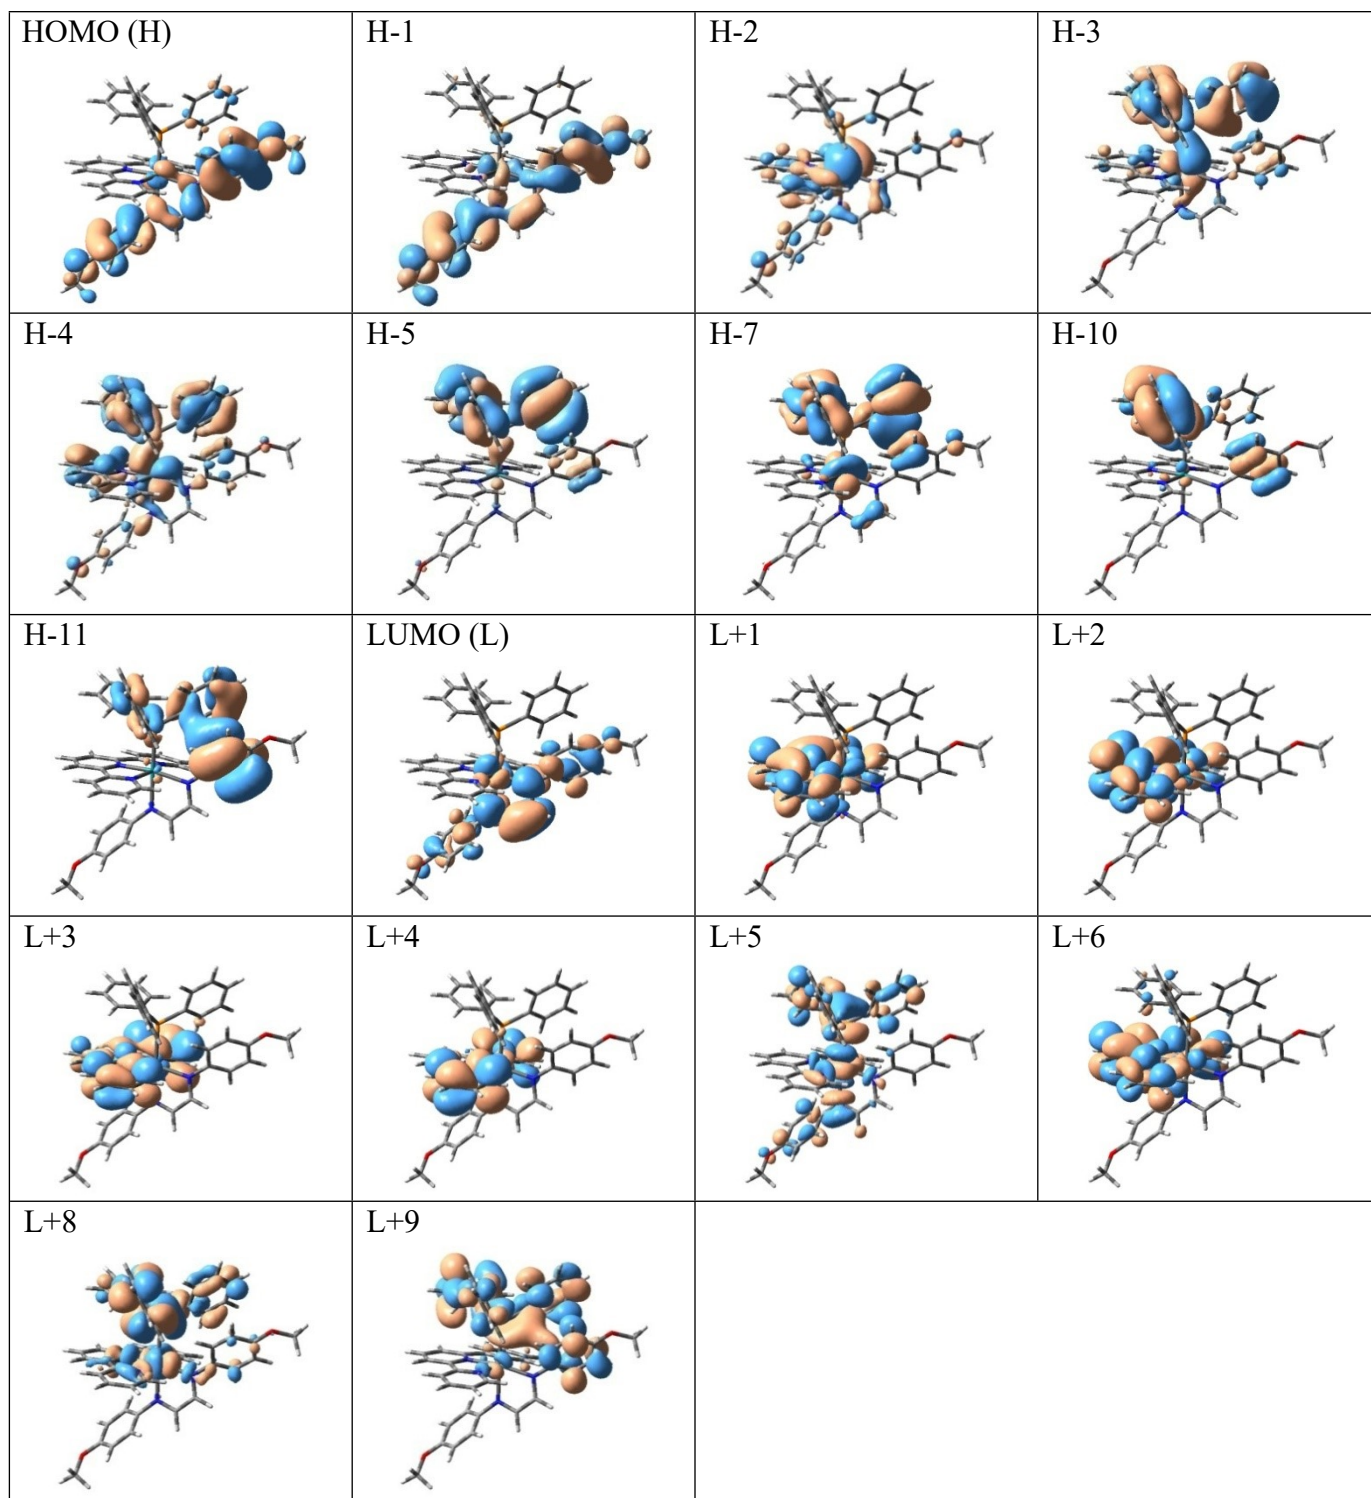

**Fig. S10.** Contour plots of the molecular orbitals of complex **1e**, which are associated with the electronic spectral transitions (See **Table S14**).

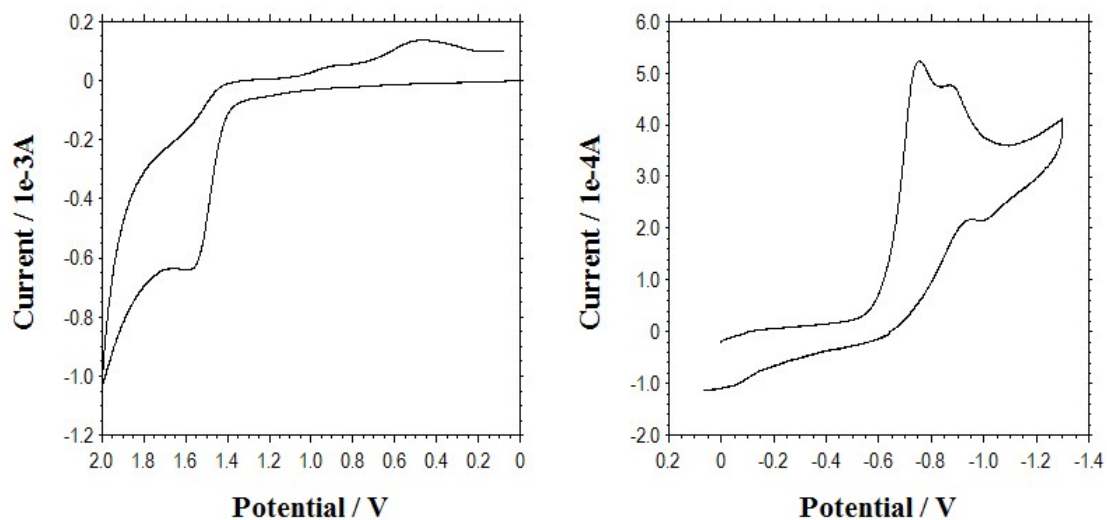

**Fig. S11.** Cyclic voltammograms of complex **1b** in acetonitrile solution (0.1 M TBHP) at a scan rate of 50 mVs<sup>-1</sup>.



**Table S16.** Optimization of experimental parameters for catalytic hydration of nitrile to corresponding amide.<sup>a</sup>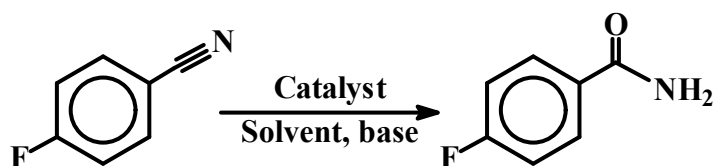

| Entry | Catalyst  | Mole % of catalyst | Solvent               | base               | Temp, °C        | Time, h | Yield <sup>b</sup> , % |
|-------|-----------|--------------------|-----------------------|--------------------|-----------------|---------|------------------------|
| 1     | <b>1a</b> | 1                  | 1:9 water-isopropanol | KO <sup>t</sup> Bu | 85              | 6       | >99                    |
| 2     | <b>1a</b> | 1                  | 1:9 water-isopropanol | KO <sup>t</sup> Bu | 85              | 4       | 94                     |
| 3     | <b>1a</b> | 0.5                | 1:9 water-isopropanol | KO <sup>t</sup> Bu | 85              | 6       | 70                     |
| 4     | <b>1a</b> | 0.1                | 1:9 water-isopropanol | KO <sup>t</sup> Bu | 85              | 6       | 30                     |
| 5     | <b>1a</b> | 1                  | 1:9 water-n-propanol  | KO <sup>t</sup> Bu | 85              | 6       | 35                     |
| 6     | <b>1a</b> | 1                  | 1:9 water-isopropanol | -                  | 85              | 6       | 20                     |
| 7     | <b>1a</b> | 1                  | 1:9 water-isopropanol | KOH                | 85              | 6       | >99                    |
| 8     | <b>1a</b> | 1                  | 1:9 water-isopropanol | KOH                | 85              | 4       | >99                    |
| 9     | <b>1a</b> | 0.5                | 1:9 water-isopropanol | KOH                | 85              | 4       | 90                     |
| 10    | <b>1a</b> | 0.1                | 1:9 water-isopropanol | KOH                | 85              | 4       | 29                     |
| 11    | <b>1a</b> | 0.5                | 1:9 water-isopropanol | KOH                | rt              | 4       | 87                     |
| 12    | <b>1a</b> | 0.5                | 1:9 water-isopropanol | KOH                | rt <sup>c</sup> | 6       | 98                     |
| 13    | <b>1a</b> | 0.5                | 2:8 water-isopropanol | KOH                | rt <sup>c</sup> | 6       | 57                     |
| 14    | <b>1a</b> | 0.5                | isopropanol           | KOH                | rt <sup>c</sup> | 6       | 77                     |
| 15    | -         | -                  | 1:9 water-isopropanol | KOH                | rt              | 6       | -                      |
| 16    | <b>1</b>  | 0.5                | 1:9 water-isopropanol | KOH                | rt <sup>c</sup> | 6       | 31                     |

<sup>a</sup> Experimental condition: Substrate 4-Fluro Benzonitrile(0.5 mmol), Catalyst [Ru(trpy)(L-OCH<sub>3</sub>)(H<sub>2</sub>O)](ClO<sub>4</sub>)<sub>2</sub>, solvent (5 mL), Base (1 mol%)

<sup>b</sup> Conversion was determined by GC analysis.

<sup>c</sup> Room tempareture stirring.

**Table S17.** Optimization of experimental parameters for catalytic hydration of alkyne to corresponding aldehyde.<sup>a</sup>

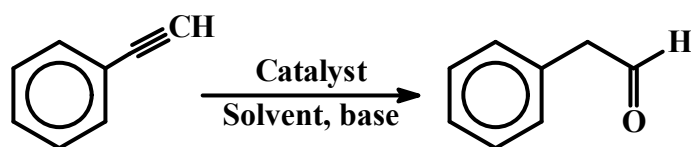

| Entry | Catalyst  | Mole % of catalyst | Solvent               | Base               | Temp, °C        | Time, h | Yield <sup>b</sup> , % |
|-------|-----------|--------------------|-----------------------|--------------------|-----------------|---------|------------------------|
| 1     | <b>1a</b> | 1                  | 1:9 acetone-water     | -                  | 70              | 6       | -                      |
| 2     | <b>1a</b> | 1                  | 1:9 acetone-water     | -                  | 85              | 6       | 19                     |
| 3     | <b>1a</b> | 1                  | 1:9 acetone-water     | KOH                | 85              | 6       | 40                     |
| 4     | <b>1a</b> | 1                  | 1:9 water-n-propanol  | KOH                | 85              | 6       | 25                     |
| 5     | <b>1a</b> | 1                  | 1:9 water-isopropanol | KOH                | 85              | 6       | 98                     |
| 6     | <b>1a</b> | 1                  | 1:9 water-isopropanol | KOH                | rt <sup>c</sup> | 6       | 71                     |
| 7     | <b>1a</b> | 1                  | 1:9 water-isopropanol | KOH                | rt <sup>c</sup> | 10      | 96                     |
| 8     | <b>1a</b> | 1                  | 1:9 water-isopropanol | KO <sup>t</sup> Bu | rt              | 10      | 87                     |
| 9     | -         | 1                  | 1:9 water-isopropanol | KOH                | rt <sup>c</sup> | 10      | -                      |
| 10    | <b>1a</b> | 1                  | isopropanol           | KOH                | rt <sup>c</sup> | 10      | 53                     |
| 11    | <b>1a</b> | 0.5                | 1:9 water-isopropanol | KOH                | rt              | 10      | 41                     |
| 12    | <b>1a</b> | 1.5                | 1:9 water-isopropanol | KOH                | rt              | 6       | 95                     |
| 13    | <b>1</b>  | 1                  | 1:9 water-isopropanol | KOH                | rt <sup>c</sup> | 10      | 61                     |

<sup>a</sup> Reaction conditions: Catalyst [Ru(trpy)(L-OCH<sub>3</sub>)(H<sub>2</sub>O)](ClO<sub>4</sub>)<sub>2</sub>; Substrate Phenylacetylene (0.5 mmol), solvent (5.0 mL), Base (1 mol%).

<sup>b</sup> Determined by GCMS.

<sup>c</sup> Room temperature stirring

**Table S18.** Crystallographic data for complexes **1a**, **1b** and **1d**.

| complex                                       | <b>1a</b>                                                                         | <b>1b</b>                                                                                         | <b>1d</b>                                                                         |
|-----------------------------------------------|-----------------------------------------------------------------------------------|---------------------------------------------------------------------------------------------------|-----------------------------------------------------------------------------------|
| empirical formula                             | C <sub>33</sub> H <sub>37</sub> Cl <sub>2</sub> N <sub>5</sub> O <sub>13</sub> Ru | C <sub>136</sub> H <sub>126</sub> Cl <sub>8</sub> N <sub>26</sub> O <sub>39</sub> Ru <sub>4</sub> | C <sub>37</sub> Cl <sub>2</sub> H <sub>40</sub> N <sub>6</sub> O <sub>13</sub> Ru |
| formula weight                                | 883.64                                                                            | 3436.50                                                                                           | 948.72                                                                            |
| crystal system                                | Triclinic                                                                         | Monoclinic                                                                                        | Orthorhombic                                                                      |
| space group                                   | P $\bar{1}$                                                                       | P2 <sub>1</sub> /c                                                                                | Pna2 <sub>1</sub>                                                                 |
| <i>a</i> (Å)                                  | 11.3948(10)                                                                       | 15.965(3)                                                                                         | 30.054(3)                                                                         |
| <i>b</i> (Å)                                  | 12.4038(10)                                                                       | 39.938(7)                                                                                         | 11.0969(10)                                                                       |
| <i>c</i> (Å)                                  | 14.2466(12)                                                                       | 12.631(2)                                                                                         | 25.405(2)                                                                         |
| $\alpha$ (°)                                  | 83.522(3)                                                                         | 90                                                                                                | 90                                                                                |
| $\beta$ (°)                                   | 69.862(2)                                                                         | 107.142(4)                                                                                        | 90                                                                                |
| $\gamma$ (°)                                  | 82.487(3)                                                                         | 90                                                                                                | 90                                                                                |
| <i>V</i> (Å <sup>3</sup> )                    | 1869.3(3)                                                                         | 7696(2)                                                                                           | 8472.6(13)                                                                        |
| <i>Z</i>                                      | 2                                                                                 | 2                                                                                                 | 8                                                                                 |
| <i>D</i> <sub>calcd</sub> /mg m <sup>-3</sup> | 1.570                                                                             | 1.483                                                                                             | 1.488                                                                             |
| <i>F</i> (000)                                | 904.0                                                                             | 3496.0                                                                                            | 3888.0                                                                            |
| crystal size (mm)                             | 0.12 × 0.17 × 0.22                                                                | 0.24 × 0.28 × 0.30                                                                                | 0.15 × 0.17 × 0.20                                                                |
| <i>T</i> (K)                                  | 273                                                                               | 273                                                                                               | 273                                                                               |
| $\mu$ (mm <sup>-1</sup> )                     | 0.633                                                                             | 0.608                                                                                             | 0.565                                                                             |
| R1 <sup>a</sup>                               | 0.0328                                                                            | 0.1065                                                                                            | 0.0612                                                                            |
| wR2 <sup>b</sup>                              | 0.0886                                                                            | 0.2880                                                                                            | 0.1491                                                                            |
| GOF <sup>c</sup>                              | 1.093                                                                             | 1.161                                                                                             | 1.058                                                                             |

$$^a \text{R1} = \sum ||F_o| - |F_c|| / \sum |F_o|$$

$$^b \text{wR2} = [\sum \{w(F_o^2 - F_c^2)^2\} / \sum \{w(F_o^2)\}]^{1/2}$$

$$^c \text{GOF} = [\sum (w(F_o^2 - F_c^2)^2) / (M - N)]^{1/2}, \text{ where M is the number of reflections and N is the number of parameters refined.}$$
